# Supplementary material for: Fabrication of carbon-based materials derived from a cobalt-based organic framework for enhancing photocatalytic degradation of dyes
Source: Royal Society of Chemistry journal article supplement (doi:10.1039/d3dt04055k), 2024-01-01
Supplement: d3dt04055k1.pdf [file d3dt04055k1.pdf]

## Supporting Information

### Fabrication of carbon-based materials derived from a cobalt-based organic framework for enhancing photocatalytic degradation of dyes

Wan-Lin Ma,<sup>a</sup> Ya-Qian Zhang,<sup>a\*</sup> Wen-Ze Li,<sup>a\*</sup> Jing Li<sup>a</sup> and Jian Luan<sup>a\*</sup>

<sup>a</sup> College of Science, Shenyang University of Chemical Technology, Shenyang, 110142, P. R. China

\* E-mails: [zhangyaqian85@126.com](mailto:zhangyaqian85@126.com); [wzli@syuct.edu.cn](mailto:wzli@syuct.edu.cn); [2010044@stu.neu.edu.cn](mailto:2010044@stu.neu.edu.cn)

**Table S1** Crystal data and structure refinement for **Co-MOF**.

| Complex                                | Co-MOF                                                                         |
|----------------------------------------|--------------------------------------------------------------------------------|
| Empirical formula                      | C <sub>49</sub> H <sub>59</sub> Co <sub>3</sub> N <sub>8</sub> O <sub>20</sub> |
| Formula weight                         | 1256.83                                                                        |
| Temperature/K                          | 293.15                                                                         |
| Crystal system                         | Monoclinic                                                                     |
| Space group                            | <i>C2/c</i>                                                                    |
| <i>a</i> /Å                            | 34.033(4)                                                                      |
| <i>b</i> /Å                            | 20.515(2)                                                                      |
| <i>c</i> /Å                            | 7.8110(10)                                                                     |
| <i>α</i> /°                            | 90                                                                             |
| <i>β</i> /°                            | 95.204(4)                                                                      |
| <i>γ</i> /°                            | 90                                                                             |
| Volume/Å <sup>3</sup>                  | 5431.1(11)                                                                     |
| <i>Z</i>                               | 4                                                                              |
| $\rho_{\text{calc}}$ g/cm <sup>3</sup> | 1.537                                                                          |
| $\mu$ /mm <sup>-1</sup>                | 0.99                                                                           |
| F(000)                                 | 2600                                                                           |
| Crystal size/mm <sup>3</sup>           | 0.18 × 0.17 × 0.15                                                             |
| Radiation                              | MoK $\alpha$ ( $\lambda$ = 0.71073)                                            |
| 2 $\theta$ range for data collection/° | 4.642 to 50.052                                                                |
| Index ranges                           | -40 ≤ <i>h</i> ≤ 37, -24 ≤ <i>k</i> ≤ 24, -9 ≤ <i>l</i> ≤ 9                    |
| Reflections collected                  | 33805                                                                          |
| Independent reflections                | 4789 [R <sub>int</sub> = 0.0554, R <sub>sigma</sub> = 0.0345]                  |
| Data/restraints/parameters             | 4789/13/339                                                                    |
| Goodness-of-fit on F <sup>2</sup>      | 1.059                                                                          |
| Final R indexes [I ≥ 2 $\sigma$ (I)]   | R <sub>1</sub> = 0.0777, wR <sub>2</sub> = 0.2317                              |
| Final R indexes [all data]             | R <sub>1</sub> = 0.1003, wR <sub>2</sub> = 0.2550                              |

## Supporting Information

**Table S2** Selected bond distances (Å) and angles (°) for **Co-MOF**.

|                                                                                                            |            |               |            |
|------------------------------------------------------------------------------------------------------------|------------|---------------|------------|
| Co1–O1                                                                                                     | 2.198(4)   | Co2–O3#1      | 2.169(4)   |
| Co1–O2                                                                                                     | 2.124(4)   | Co2–O3#2      | 2.169(4)   |
| Co1–O4                                                                                                     | 2.060(5)   | Co2–O6        | 2.074(5)   |
| Co1–N1                                                                                                     | 2.112(5)   | Co2–O6#3      | 2.074(5)   |
| Co1–N3#1                                                                                                   | 2.107(5)   | Co2–N2        | 2.128(5)   |
| Co1–C1                                                                                                     | 2.498(6)   | Co2–N2#3      | 2.128(5)   |
| Co1–O5                                                                                                     | 2.080(9)   | Co2–C5#2      | 2.519(7)   |
| O1–Co1–C1                                                                                                  | 30.52(16)  | O3#1–Co2–C5#2 | 30.08(10)  |
| O2–Co1–O1                                                                                                  | 60.77(14)  | O3#2–Co2–C5#2 | 30.08(10)  |
| O2–Co1–C1                                                                                                  | 30.27(17)  | O6#3–Co2–O3#1 | 87.44(17)  |
| O4–Co1–O1                                                                                                  | 87.85(18)  | O6–Co2–O3#1   | 89.41(18)  |
| O4–Co1–O2                                                                                                  | 89.8(2)    | O6#3–Co2–O3#2 | 89.41(18)  |
| O4–Co1–N1                                                                                                  | 90.22(19)  | O6–Co2–O3#2   | 87.44(17)  |
| O4–Co1–N3#1                                                                                                | 91.3(2)    | O6–Co2–O6#3   | 176.4(2)   |
| O4–Co1–C1                                                                                                  | 88.0(2)    | O6–Co2–N2     | 93.1(2)    |
| O4–Co1–O5                                                                                                  | 177.4(4)   | O6#3–Co2–N2#3 | 93.1(2)    |
| N1–Co1–O1                                                                                                  | 161.97(16) | O6#3–Co2–N2   | 89.2(2)    |
| N1–Co1–O2                                                                                                  | 101.32(18) | O6–Co2–N2#3   | 89.2(2)    |
| N1–Co1–C1                                                                                                  | 131.51(19) | O6–Co2–C5#2   | 88.18(12)  |
| N3#1–Co1–O1                                                                                                | 98.74(16)  | O6#3–Co2–C5#2 | 88.18(12)  |
| N3#1–Co1–O2                                                                                                | 159.42(18) | N2#3–Co2–O3#1 | 99.91(16)  |
| N3#1–Co1–N1                                                                                                | 99.22(19)  | N2–Co2–O3#2   | 99.90(16)  |
| N3#1–Co1–C1                                                                                                | 129.25(19) | N2–Co2–O3#1   | 159.79(17) |
| O5–Co1–O1                                                                                                  | 94.5(5)    | N2#3–Co2–O3#2 | 159.79(17) |
| O5–Co1–O2                                                                                                  | 92.2(4)    | N2#3–Co2–N2   | 100.2(3)   |
| O5–Co1–N1                                                                                                  | 87.8(5)    | N2–Co2–C5#2   | 129.91(13) |
| O5–Co1–C1                                                                                                  | 94.6(4)    | N2#3–Co2–C5#2 | 129.91(13) |
| O3#1–Co2–O3#2                                                                                              | 60.2(2)    |               |            |
| Symmetry codes: #1 $3/2 - x, 1/2 + y, 1/2 - z$ ; #2 $1/2 + x, 1/2 + y, 1 + z$ ; #3 $2 - x, + y, 3/2 - z$ . |            |               |            |

## Supporting Information

**Table S3** Quasi-first-order rate constant of photocatalytic degradation of **Co-MOF** and its derived carbon materials.

| Material        | Rare constant k (min <sup>-1</sup> ) |       |       |       |       |
|-----------------|--------------------------------------|-------|-------|-------|-------|
|                 | MB                                   | RhB   | GV    | MO    | RB    |
| <b>Co-MOF</b>   | 6.232                                | 6.381 | 0.005 | 0.004 | 0.002 |
| <b>Co-C200</b>  | 5.149                                | 7.206 | 0.003 | 0.004 | 0.004 |
| <b>Co-C400</b>  | 0.001                                | 5.266 | 0.005 | 0.003 | 0.002 |
| <b>Co-C600</b>  | 0.002                                | 0.001 | 0.006 | 0.007 | 0.002 |
| <b>Co-C800</b>  | 0.009                                | 0.001 | 0.008 | 0.017 | 0.003 |
| <b>Co-C1000</b> | 0.009                                | 0.002 | 0.015 | 0.014 | 0.003 |

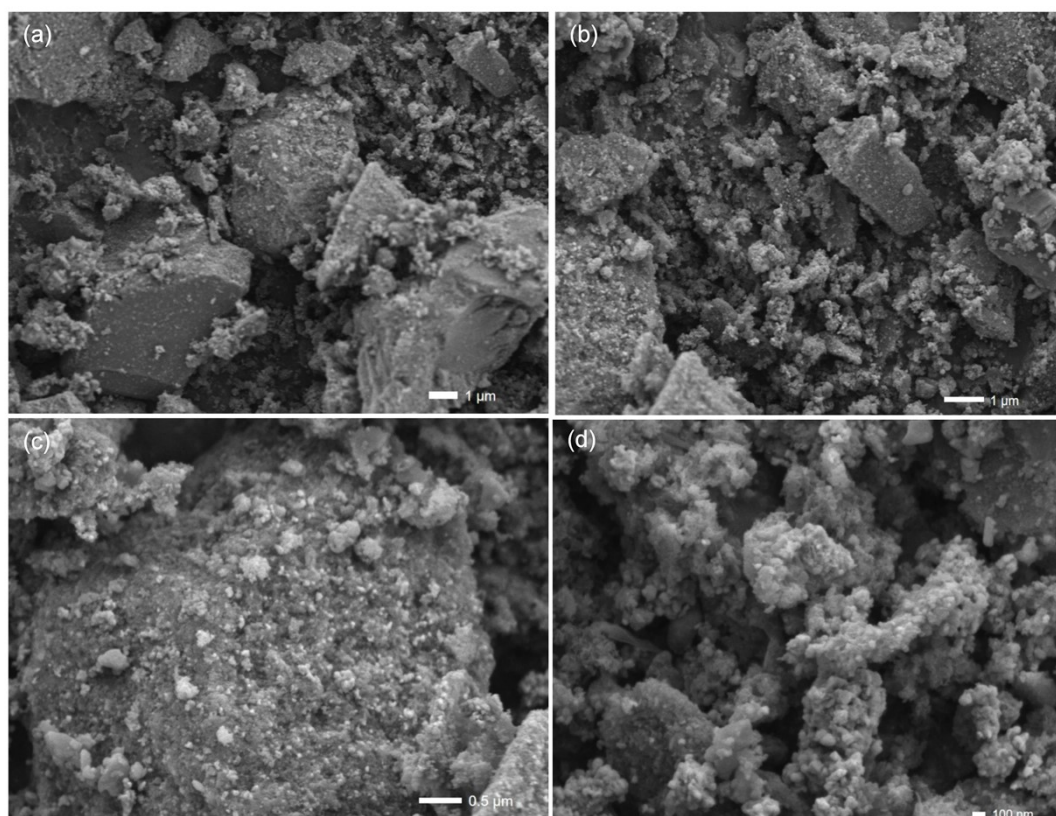

**Fig. S1** SEM images of **Co-MOF**.

## Supporting Information

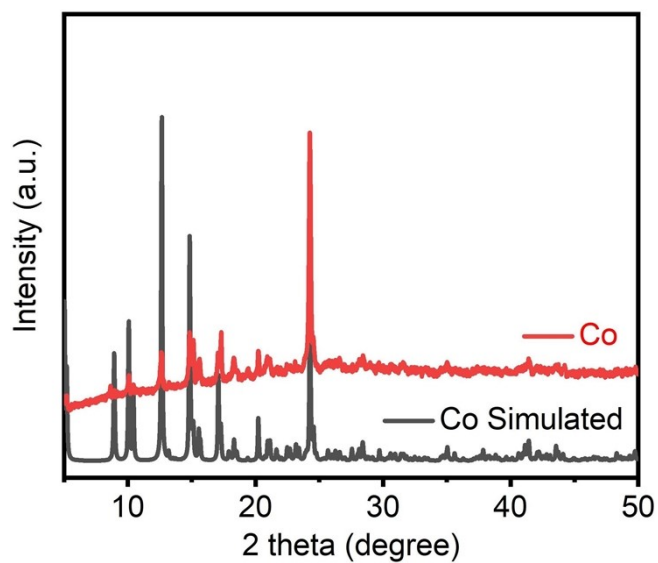

**Fig. S2** The PXRD patterns of simulated and fresh sample of **Co-MOF**.

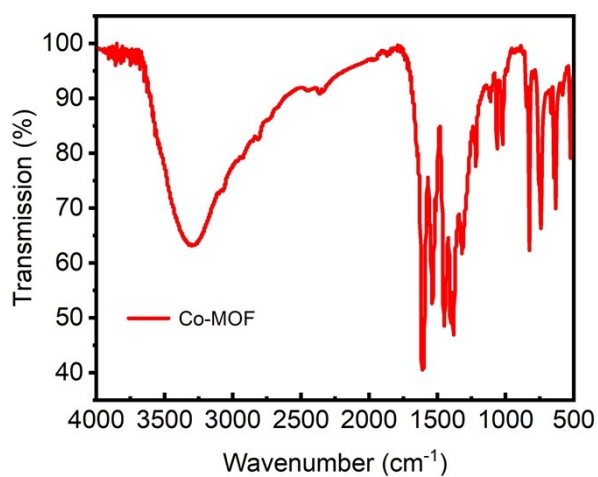

**Fig. S3** The FTIR spectrum of **Co-MOF**.

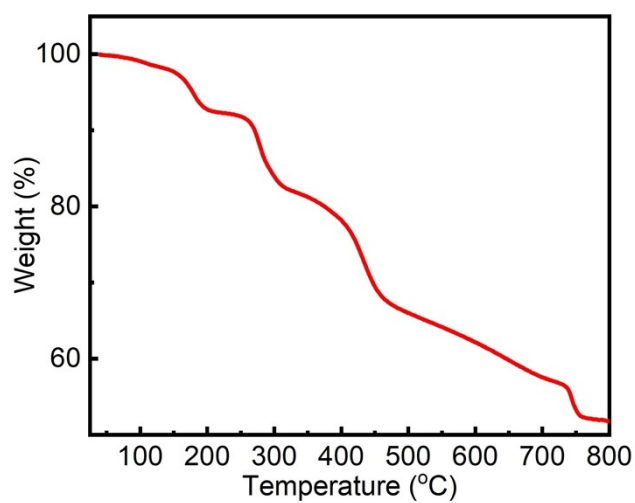

**Fig. S4** The TG curve of **Co-MOF**.

## Supporting Information

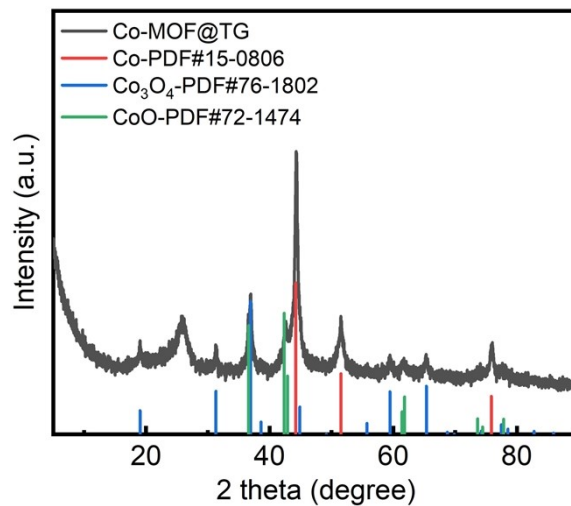

**Fig. S5** PXRD pattern of TG residue of Co-MOF.

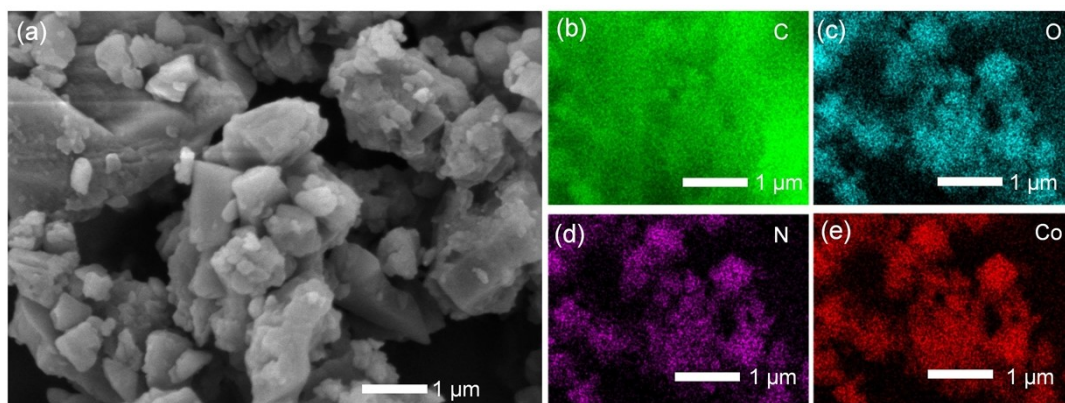

**Fig. S6** Typical SEM (a) and EDX (b–e) images of Co-C200 and the corresponding elemental maps of Co, N, C and O.

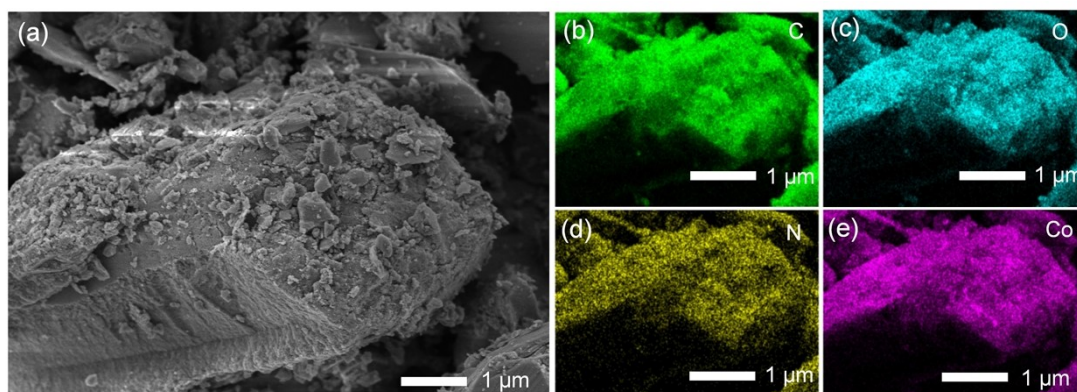

**Fig. S7** Typical SEM (a) and EDX (b–e) images of Co-C400 and the corresponding elemental maps of Co, N, C and O.

## Supporting Information

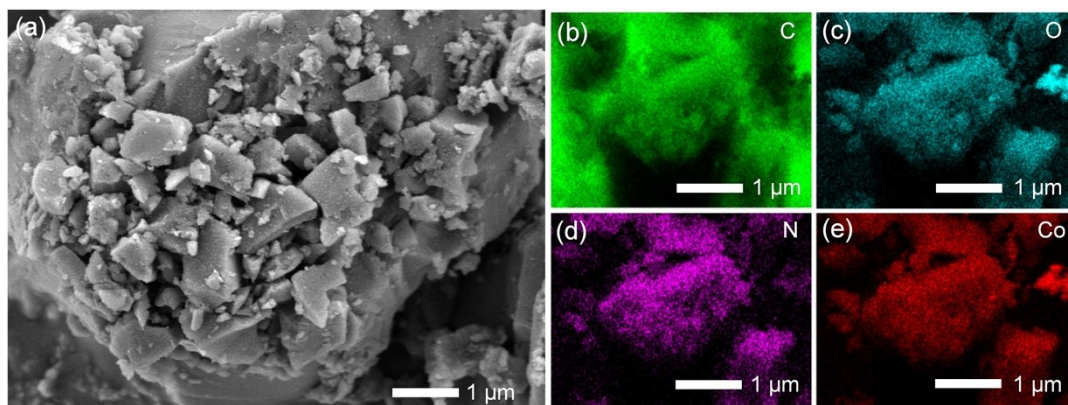

**Fig. S8** Typical SEM (a) and EDX (b–e) images of **Co-C600** and the corresponding elemental maps of Co, N, C and O.

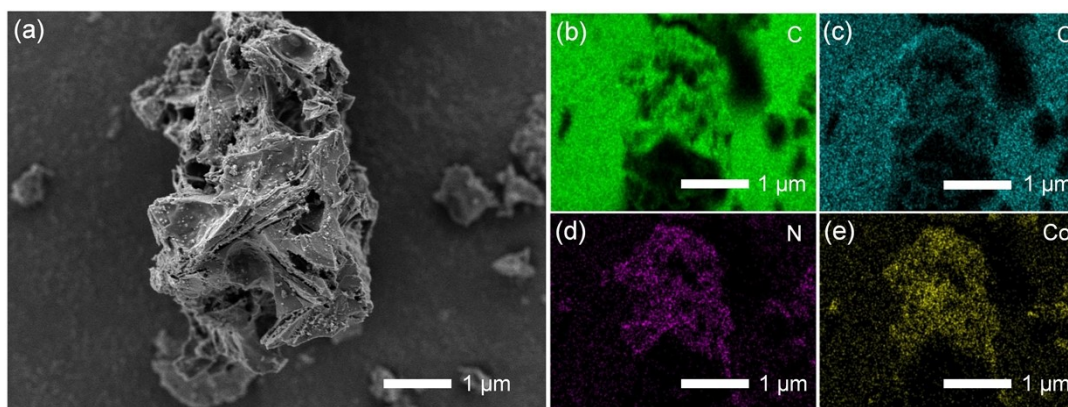

**Fig. S9** Typical SEM (a) and EDX (b–e) images of **Co-C800** and the corresponding elemental maps of Co, N, C and O.

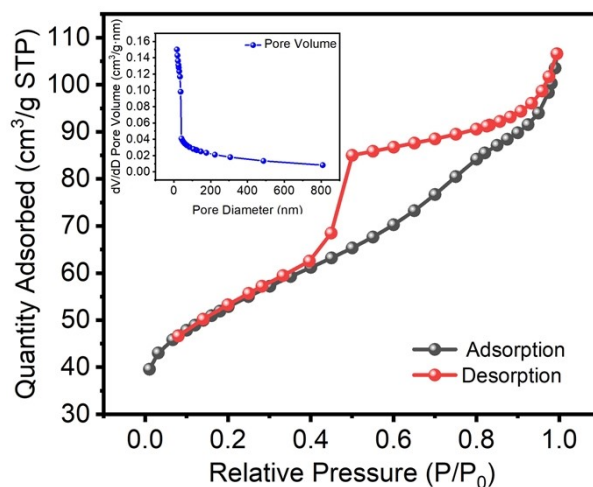

**Fig. S10** Nitrogen adsorption and desorption isotherms (Insert: the pore size distribution) of **Co-C1000**.

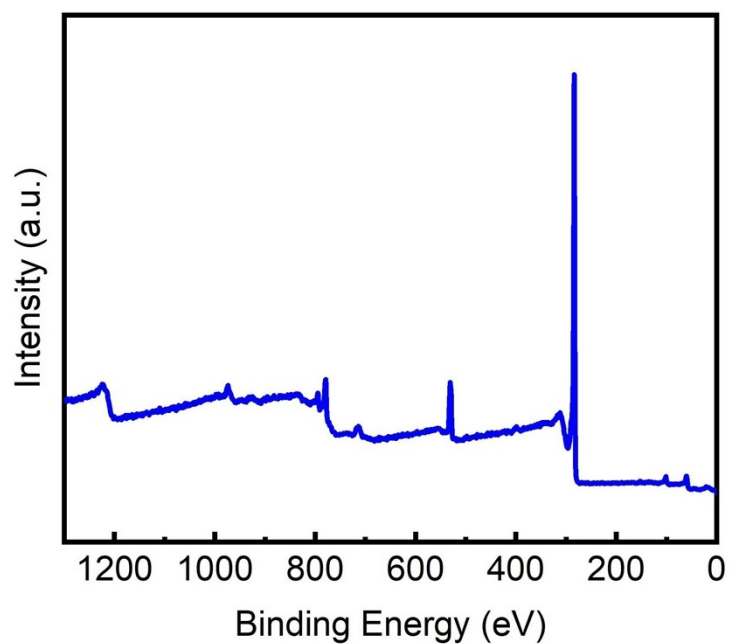

**Fig. S11** XPS spectrum of **Co-C1000**.

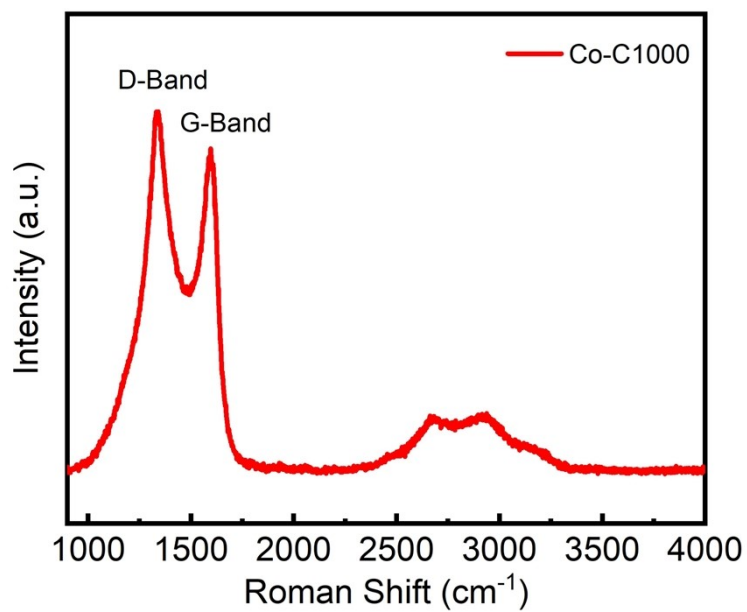

**Fig. S12** Raman spectrum of **Co-C1000**.

## Supporting Information

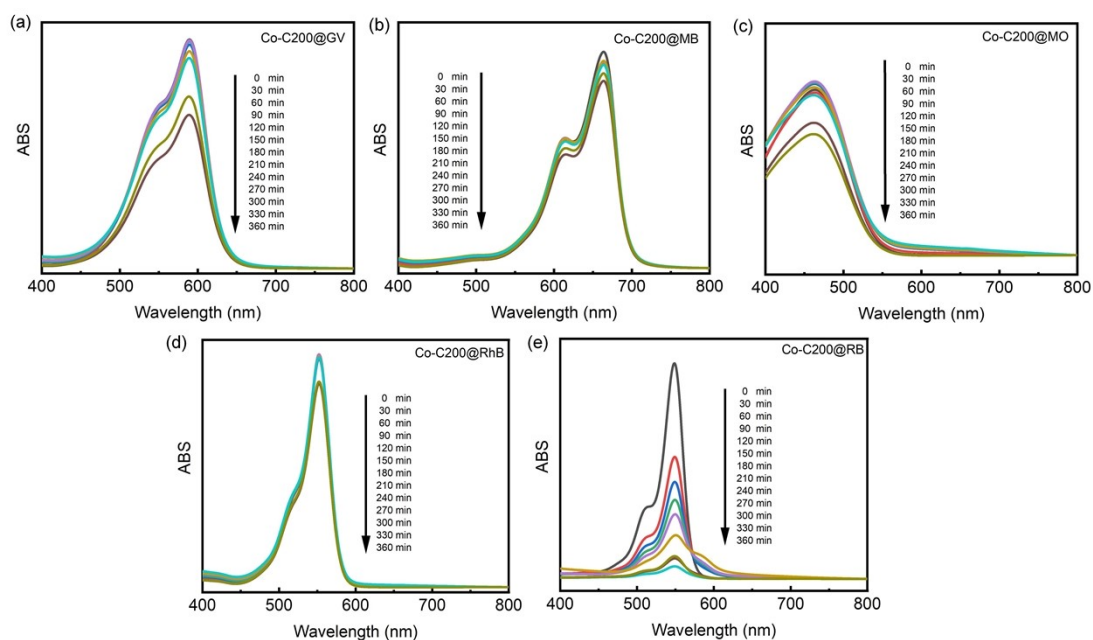

**Fig. S13** UV-vis spectra of GV (a), MB (b), MO (c), RhB (d) and RB (e) solutions recorded with **Co-C200** after different degradation times.

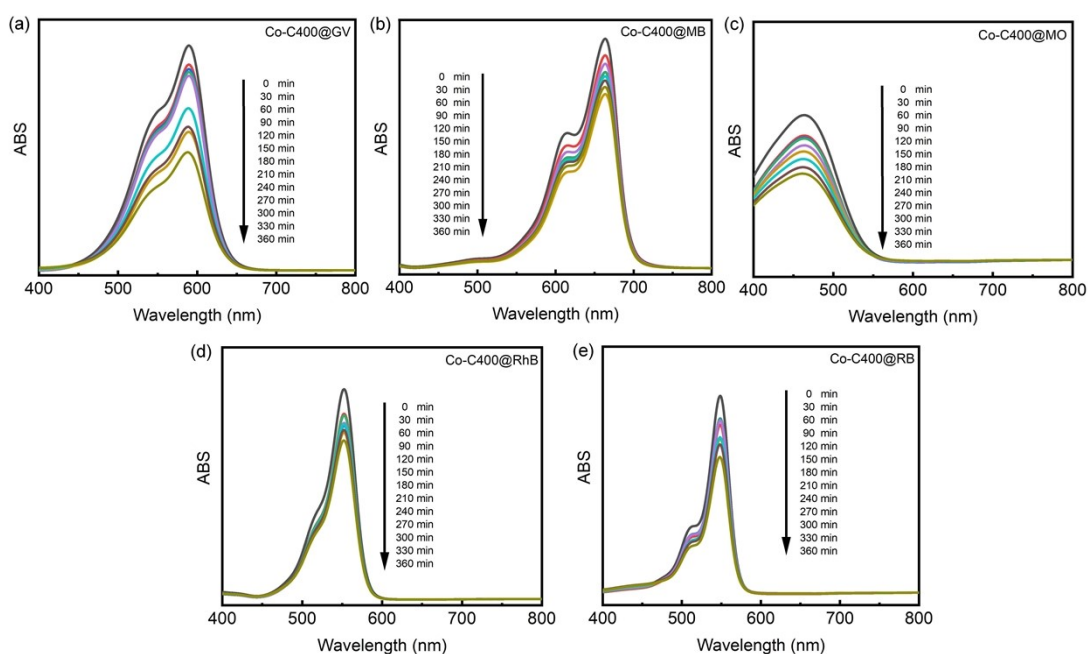

**Fig. S14** UV-vis spectra of GV (a), MB (b), MO (c), RhB (d) and RB (e) solutions recorded with **Co-C400** after different degradation times.



## Supporting Information

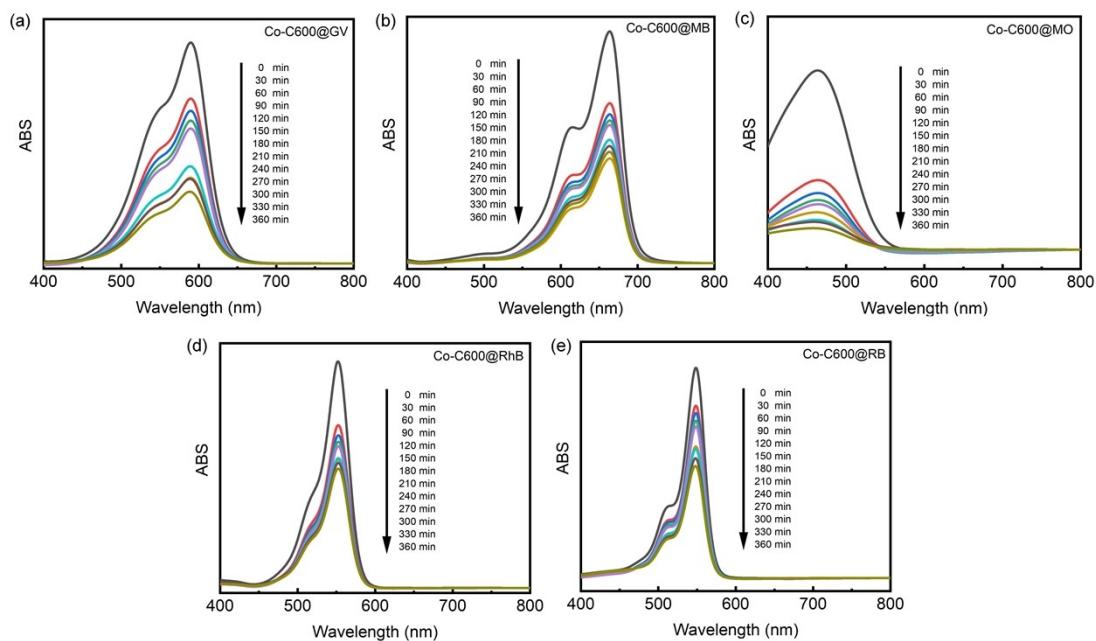

**Fig. S15** UV-vis spectra of GV (a), MB (b), MO (c), RhB (d) and RB (e) solutions recorded with **Co-C600** after different degradation times.

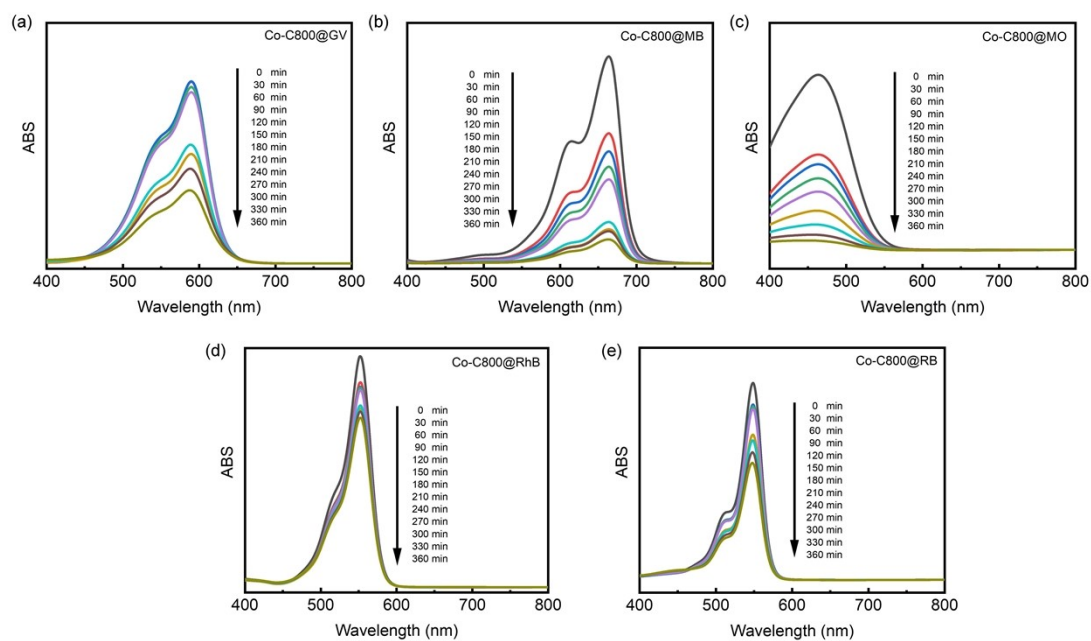

**Fig. S16** UV-vis spectra of GV (a), MB (b), MO (c), RhB (d) and RB (e) solutions recorded with **Co-C800** after different degradation times.

## Supporting Information

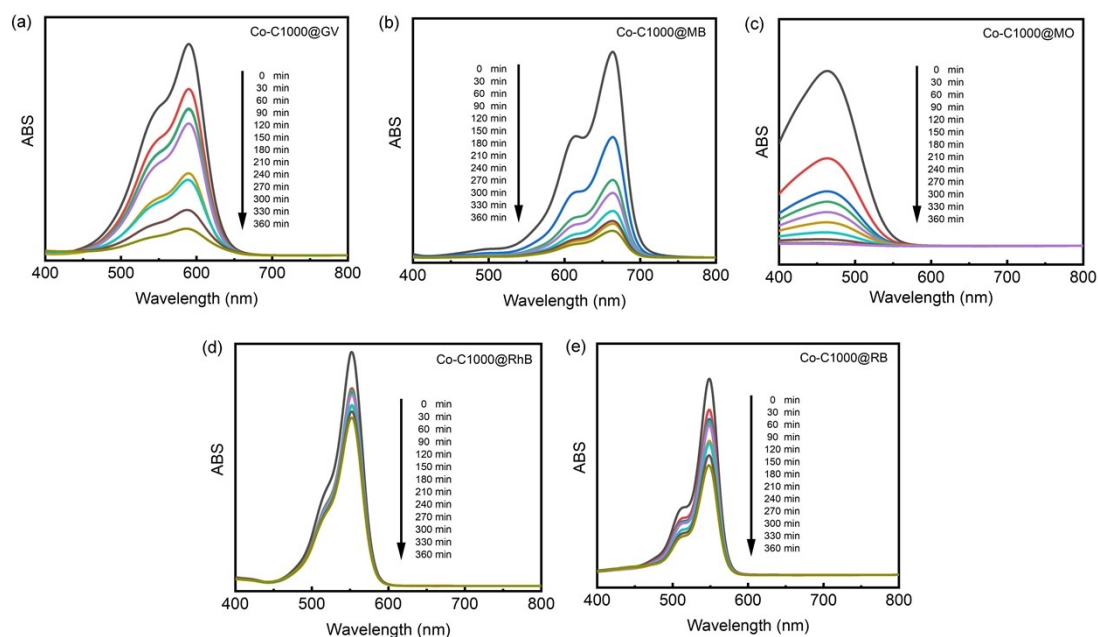

**Fig. S17** UV-vis spectra of GV (a), MB (b), MO (c), RhB (d) and RB (e) solutions recorded with **Co-C1000** after different degradation times.

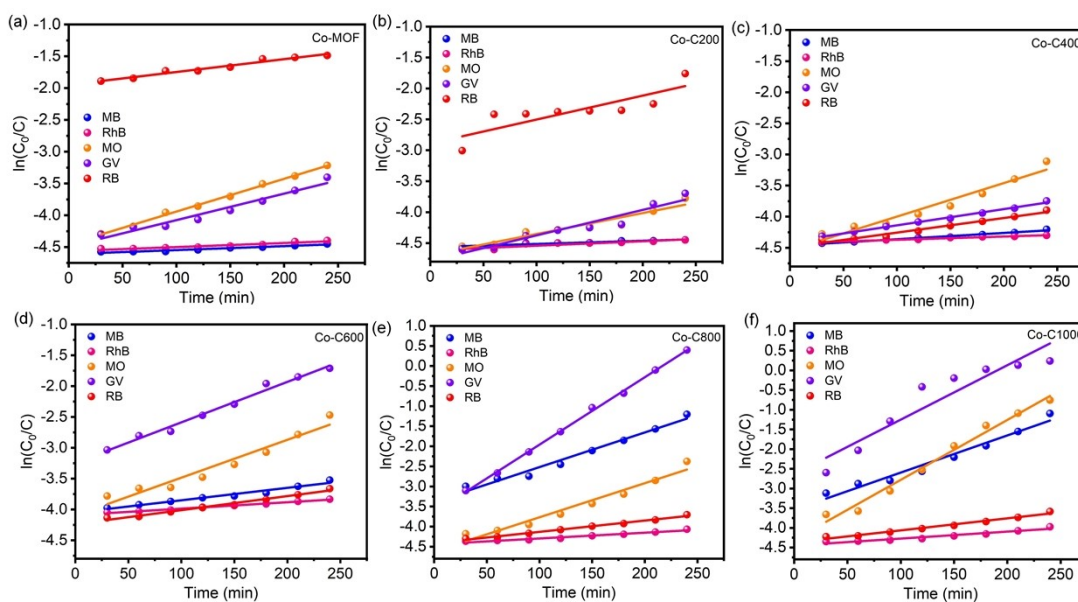

**Fig. S18** Comparison of the rate constant  $k$  in the presence of **Co-MOF** and its derived carbon materials (evaluating that the reactions by the pseudo-first-order kinetic model).

## Supporting Information

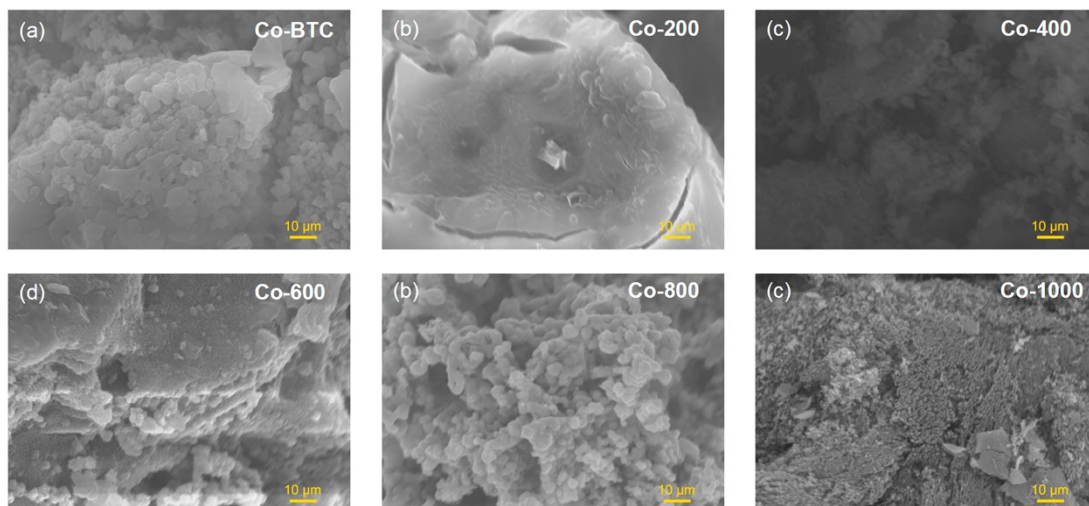

**Fig. S19** Typical SEM images of **Co-BTC** (a), **Co-200** (b), **Co-400** (c), **Co-600** (d), **Co-800** (e), **Co-1000** (f).

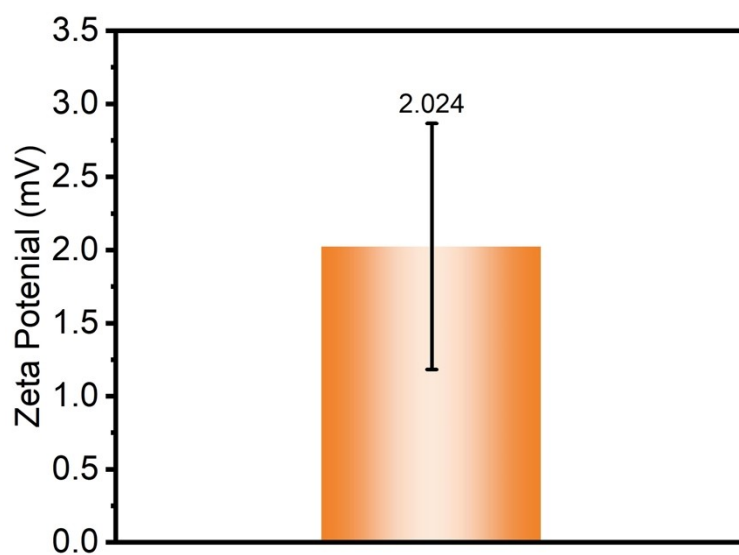

**Fig. S20** Zeta potential of **Co-C1000**.
